# Supplementary material
Source: PubMed Central journal article supplement (PMC3434265)
Supplement: NIHMS369692-supplement-01.pdf [file NIHMS369692-supplement-01.pdf]

SUPPLEMENTARY FIGURE LEGENDS

**Supplementary Figure 1. No Correlation Between Weights and Lesion Burden in LDLr-/- TRIF<sup>LPS2/LPS2</sup> Male Mice.** Possible relationships between the weights and lesion burden in hearts and aortae of LDLr-/- or LDLr-/-TRIF<sup>LPS2/LPS2</sup> male mice following 12 and 15 weeks of HFD feeding were explored using Sigma Plot (Version 8.0). No coefficient of determination (R<sup>2</sup>) greater than 0.4 was found in any relationship, indicating there was no correlation between weights and lesion burden.

**Supplementary Figure 2. Necrosis in Heart Sinus Valve Lesion of Hyperlipidemic LDLr-/- and LDLr-/-TRIF<sup>LPS2/LPS2</sup> Mice.** Cohorts of age-matched males were fed HFD for 12 weeks. Lesional data and CD68+ staining from these hearts are shown in Figures 3 and 4, respectively. Sections near the median of the volumetric analysis from hearts stained with Oil Red O were selected for analysis of necrosis and morphometric lesion analysis by H&E staining.

**Supplementary Figure 3. IL-12/IL-23p40 ELISA of Plasma from LDLr-/-TLR3-/- Mice.** Groups of chow-fed male LDLr-/- or LDLr-/-TLR3-/- mice were i.p. injected with saline (n=4) or 20 µg poly(I:C) (n=8) (TLR3 agonist). Plasma was collected at 4 hours post-injection and plasma IL-12/IL-23p40 was measured by ELISA.

Supplementary Table 1.

**Weights and Total Plasma Cholesterol (TPC) of LDLr-/-  
TRIF<sup>LPS2/LPS2</sup> Males**

| <b>Weeks<br/>HFD</b>                  | <b>0</b>      |                | <b>6</b>       |                | <b>12</b>      |                | <b>15</b>      |                |
|---------------------------------------|---------------|----------------|----------------|----------------|----------------|----------------|----------------|----------------|
| <b>Genotype</b>                       | Weight<br>(g) | TPC<br>(mg/dl) | *Weight<br>(g) | TPC<br>(mg/dl) | *Weight<br>(g) | TPC<br>(mg/dl) | *Weight<br>(g) | TPC<br>(mg/dl) |
| <b>LDLr-/-</b>                        | 20.3<br>±0.4  | 247<br>±7      | 28.2<br>±0.4   | 1074<br>±64    | 33.6<br>±0.9   | 1432<br>±107   | 35.8<br>±0.6   | 1854<br>±79    |
| <b>LDLr-/-<br/>TRIF<sup>*/*</sup></b> | 19.9<br>±0.4  | 251<br>±10     | 26.8<br>±0.5   | 970<br>±52     | 29.2<br>±0.8   | 1608<br>±105   | 30.9<br>±1.5   | 1964<br>±302   |

Values are mean ± S.E. in each group (n=10).

\*p<0.01.

186x141mm (300 x 300 DPI)

Supplementary Table 2.

Weights and Total Plasma Cholesterol (TPC) of  
LDLr-/-TLR3-/- Males

| Weeks<br>HFD       | 0             |                | 6             |                | 10            |                 | 14            |                |
|--------------------|---------------|----------------|---------------|----------------|---------------|-----------------|---------------|----------------|
| Genotype           | Weight<br>(g) | TPC<br>(mg/dl) | Weight<br>(g) | TPC<br>(mg/dl) | Weight<br>(g) | *TPC<br>(mg/dl) | Weight<br>(g) | TPC<br>(mg/dl) |
| LDLr-/-            | 21.2<br>±0.2  | 241<br>±5      | 27.0<br>±0.5  | 1258<br>±39    | 29.9<br>±0.7  | 1168<br>±51     | 33.7<br>±1.3  | 1165<br>±98    |
| LDLr-/-<br>TLR3-/- | 21.5<br>±0.5  | 229<br>±7      | 27.2<br>±0.7  | 1202<br>±52    | 29.5<br>±0.6  | 998<br>±65      | 29.7<br>±1.6  | 1106<br>±52    |

Values are mean ± S.E. in each group (n=10).  
\*p<0.05.

190x138mm (300 x 300 DPI)

Supplementary Figure 1.

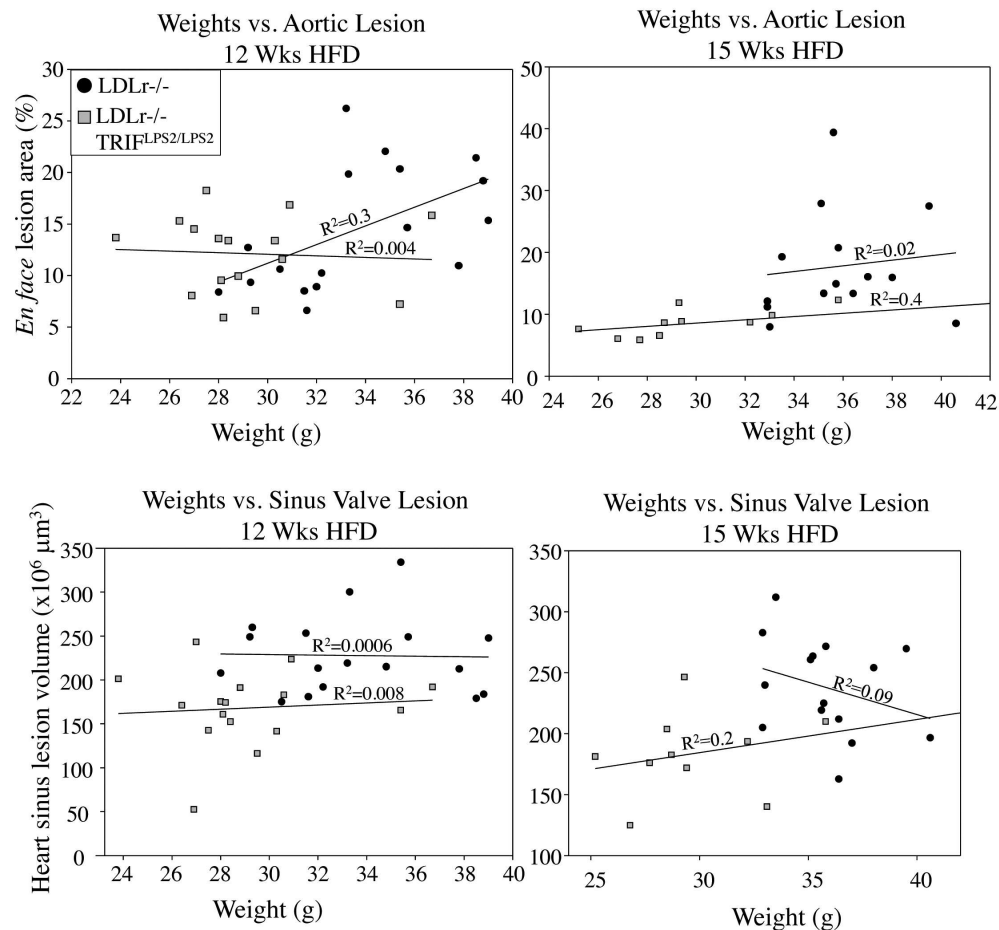

Supplementary Figure 1. No Correlation Between Weights and Lesion Burden in LDLr-/-TRIFLPS2/LPS2 Male Mice. Possible relationships between the weights and lesion burden in hearts and aortae of LDLr-/- or LDLr-/-TRIFLPS2/LPS2 male mice following 12 and 15 weeks of HFD feeding were explored using Sigma Plot (Version 8.0). No coefficient of determination ( $R^2$ ) greater than 0.4 was found in any relationship, indicating there was no correlation between weights and lesion burden.

190x196mm (300 x 300 DPI)

Supplementary Figure 2.

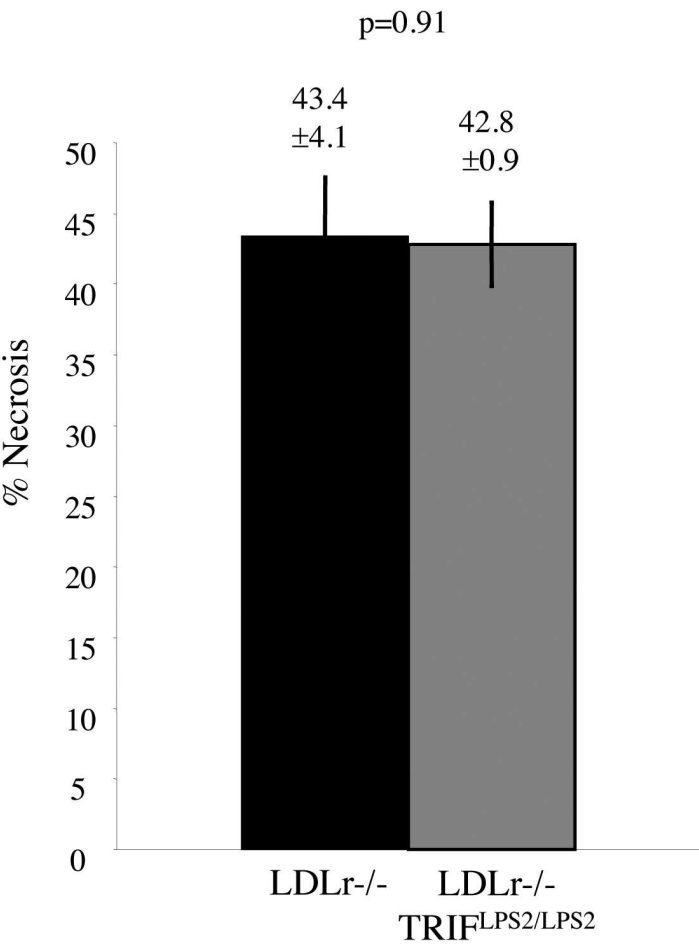

Supplementary Figure 2. Necrosis in Heart Sinus Valve Lesion of Hyperlipidemic LDLr-/- and LDLr-/- TRIF<sup>LPS2</sup>/LPS2 Mice. Cohorts of age-matched males were fed HFD for 12 weeks. Lesional data and CD68+ staining from these hearts are shown in Figures 3 and 4, respectively. Sections near the median of the volumetric analysis from hearts stained with Oil Red O were selected for analysis of necrosis and morphometric lesion analysis by H&E staining.  
133x152mm (300 x 300 DPI)

## Supplementary Figure 3.

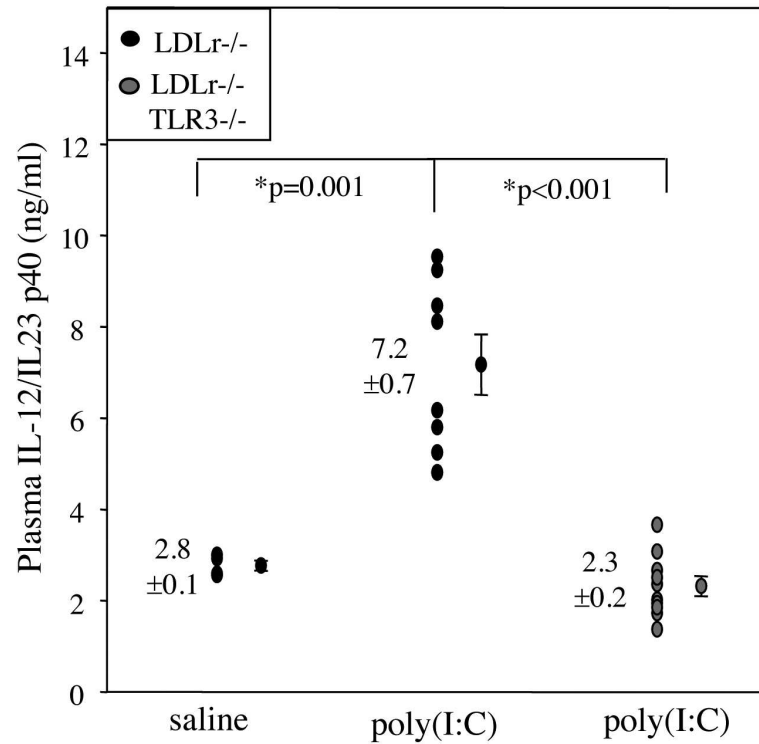

Supplementary Figure 3. IL-12/IL-23p40 ELISA of Plasma from LDLr-/-TLR3-/- Mice. Groups of chow-fed male LDLr-/- or LDLr-/-TLR3-/- mice were i.p. injected with saline (n=4) or 20 µg poly(I:C) (n=8) (TLR3 agonist). Plasma was collected at 4 hours post-injection and plasma IL-12/IL-23p40 was measured by ELISA.

144x133mm (300 x 300 DPI)
